1 **Title** A causal framework for assessing the transportability of clinical prediction models

2 Jana Fehr<sup>\*1,2</sup>, Marco Piccininni<sup>3,4</sup>, Tobias Kurth<sup>3</sup>, Stefan Konigorski<sup>\*1,2,5</sup>

3 1 Digital Health and Machine Learning, Hasso-Plattner-Institute, Potsdam, Germany

4 2 Digital Engineering Faculty, University of Potsdam, Germany

5 3 Institute of Public Health, Charité – Universitätsmedizin Berlin, Berlin, Germany

6 4 Center for Stroke Research Berlin, Charité – Universitätsmedizin Berlin, Berlin, Germany

7 5 Hasso Plattner Institute for Digital Health at Mount Sinai, Icahn School of Medicine at Mount Sinai, New York, NY, USA.

8

9 \* Corresponding authors:

Jana Fehr & Stefan Konigorski

Hasso-Plattner-Institut für Digital Engineering gGmbH

Prof.-Dr.-Helmert-Str. 2-3

14482 Potsdam, Germany

e-Mail: [jana.fehr@hpi.de](mailto:jana.fehr@hpi.de); [stefan.konigorski@hpi.de](mailto:stefan.konigorski@hpi.de)

10

11 †Data used in preparation of this article were obtained from the Alzheimer's Disease Neuroimaging Initiative (ADNI) database

12 (adni.loni.usc.edu). As such, the investigators within the ADNI contributed to the design and implementation of ADNI and/or

13 provided data but did not participate in the analysis or writing of this report. A complete listing of ADNI investigators can be found

14 at: [https://adni.loni.usc.edu/wp-content/uploads/how\\_to\\_apply/ADNI\\_Acknowledgement\\_List.pdf](https://adni.loni.usc.edu/wp-content/uploads/how_to_apply/ADNI_Acknowledgement_List.pdf)

15

19 **Abstract**

20 **BACKGROUND:** Machine learning promises to support the diagnosis of dementia and  
21 Alzheimer's Disease, but may not perform well in new settings. We present a framework to  
22 assess the transportability of models predicting cognitive impairment in external settings with  
23 different demographics.

24 **METHODS:** We mapped and quantified relationships between variables associated with  
25 cognitive impairment using causal graphs, structural equation models, and data from the ADNI  
26 study. These estimates generated datasets for training and validating prediction models. We  
27 measured transportability to external settings with interventions on age, APOE ε4, and sex,  
28 using calibration metric differences.

29 **RESULTS:** Models predicting with causes of the outcome were 1.3-12.8 times more  
30 transportable than those predicting with consequences. Logistic and lasso models had better  
31 calibration in internal validation settings than random forest and boosted models.

32 **DISCUSSION:** Applying a framework considering causal relationships is crucial to assess  
33 transportability. Future research could investigate more interventions and methods to quantify  
34 causal relationships in risk prediction.

35 Keywords: Alzheimer's Disease, clinical risk prediction, DAG, causality, transportability

## 36 **Research in context**

37 1. Systematic Review: Machine learning models supporting the diagnosis of cognitive  
38 impairment may not perform well in external validation settings. Theoretical research  
39 established that models can be more transportable to external settings when predictors  
40 are causes of the outcome. Causal frameworks and practical examples to assess  
41 transportability are needed.

42 2. Interpretation: We developed and applied a causal framework to assess the  
43 transportability of models predicting cognitive impairment to settings with different  
44 demographics using a causal graph and interventions on semi-synthetic data. Our  
45 results add a practical example showing that models are more transportable when  
46 predicting with causes of the outcome rather than with its consequences. This supports  
47 using causal frameworks in prediction models to improve transportability.

48 3. Future directions: Our framework can be extended to include more complex semi-  
49 synthetic data generation methods to quantify causal relationships. Further  
50 applications to risk prediction models could assess transportability under different  
51 interventions that simulate complex differences between populations.

## 52 **Introduction**

53 Alzheimer's disease (AD) and other forms of dementia are the second leading cause of death  
54 globally [1] and more than 55 million people currently suffer from dementia. Detecting  
55 dementia at an early stage of cognitive impairment is important to give affected individuals  
56 adequate care and eventually administer disease-modifying treatments [2]. In recent years,

57 several machine learning (ML) models have been proposed to support clinical decision making  
58 by predicting the diagnosis of AD and cognitive impairment [3–8]. One obstacle for deploying  
59 such prediction models in clinical practice is that they are often developed in a particular setting  
60 (e.g., one hospital or region), but might not generalize well when being transported (i.e., being  
61 applied) to other settings (e.g., in another hospital or regions with different patient  
62 demographics). One reason for reduced transportability may be that ML models learn non-  
63 causal associations between input and output variables, which might be different in external  
64 settings [9,10]. This scenario can occur especially when models predict a diagnosis based on  
65 clinical consequences of the disease (e.g., when prediction is in the anti-causal direction) [11–  
66 13].

67 Two approaches have the potential to improve transportability for prediction models. First,  
68 causal relationships can be incorporated in prediction models *a priori* for learning relationships  
69 that are more stable across settings and can therefore avoid systematic failures in external  
70 settings [10,14–17]. To this aim, directed acyclic graphs (DAGs) are a useful tool to map  
71 assumed causal relationships between variables, represent differences and commonalities  
72 between settings [18,19], and select variables for transportable health prediction tasks [20–  
73 22]. Second, the causal validity of learned relationships can be assessed through guided  
74 interventions on data distributions, to simulate differences between internal and external  
75 validation settings [17,23,24].

76 Few previous studies have employed causal thinking and DAGs to develop transportable  
77 clinical prediction models [25–29]. Piccininni et al. described the use of DAGs for selecting  
78 predictors in a hypothetical clinical risk prediction model for AD [25]. They discussed that  
79 prediction models for AD are more likely to transport well to different settings when the  
80 selected predictor variables are causes of AD and not consequences. However, their study  
81 included only three variables and a theoretical simulation.

82 While theories on transportability exist, statistical frameworks are needed to assess the  
83 transportability of trained prediction models in new settings in practice. In this work, we apply

84 a causal framework to assess the transportability of clinical prediction models for cognitive  
85 impairment in external validation settings with different demographics.

## 86 **Methods**

### 87 Overview

88 As first step in our framework, we mapped assumptions about causes and consequence of  
89 cognitive impairment in a DAG (Figure 1) and estimated the associations using a structural  
90 equation model (SEM) applied to data from the Alzheimer's Disease Neuroimaging Initiative  
91 (ADNI). With the estimates, we generated datasets to train and validate four ML algorithms  
92 (logistic regression, lasso regression, random forest and generalised boosted regression). We  
93 assessed the transportability of ML models between internal and external validation datasets,  
94 using the difference in calibration. The external settings contained interventions on the  
95 distributions of age, APOE  $\epsilon 4$  prevalence and sex. All prediction algorithms and data-  
96 simulations were implemented using R version 4.0.3.

### 97 Data source and data preprocessing

98 We used the TADPOLE grand challenge dataset (<https://tadpole.grand-challenge.org/Data/>),  
99 which was derived from ADNI [30,31]. The ADNI study acquired multiple, longitudinal,  
100 measurements from elderly subjects across more than 50 clinics in USA and Canada. We  
101 selected individuals who had measurements at baseline (n=1,737) and selected baseline  
102 variables that have a reported association with AD and had less than 30% of missing entries.  
103 A complete list of the variables is provided in Supplementary Table S1. Detailed information  
104 on data preprocessing is provided in Supplementary Text 1. Missing data was imputed using  
105 the R package 'mice' with default settings, and one imputed dataset was generated. All  
106 numeric variables were normalized by z-transformation.

## 107 DAG creation

108 In DAGs, nodes represent variables and directed edges represent causal relationships  
109 pointing from the cause to the effect [18,32,33]. We reviewed scientific literature to identify  
110 causal relationships between variables in our dataset that are involved in cognitive impairment  
111 and AD processes (Supplementary Table S2) and mapped them in a first DAG  
112 (Supplementary Figure 1). Then, we tested if the generated DAG was a good fit to the ADNI  
113 dataset, using conditional independence testing with the R package ‘dagitty’ [34]. We reviewed  
114 test results with low p-values and large point estimates, which indicated causal relationships  
115 that violated conditional independence. We added 13 causal connections (Supplementary  
116 Text 2) according to the test results and our domain expertise to create the final DAG (Figure  
117 2).

## 118 Semi-synthetic data generation using structural equation models

119 We fitted a structural equation model (SEM) using the ADNI dataset to quantify the causal  
120 relationships specified in our DAG. The SEM was implemented using the ‘sem’ function in the  
121 R package ‘lavaan’ with default parameters [35]. For numeric endogenous (dependent)  
122 variables, the function computes weighted least squares estimates. For categorical  
123 endogenous variables, the function automatically uses a diagonally weighted least squares  
124 estimator and assumes that a conditionally normally distributed latent variable underlies the  
125 categorical variable (and estimates the thresholds).

126

127 We then used the SEM parameter estimates to generate five semi-synthetic datasets with  
128 each 10,000 individuals: One for training, one for internal validation and three for external  
129 validation of ML models (Figure 1). We bootstrapped exogenous (independent) variables (age,  
130 APOE  $\epsilon$ 4 and sex) together 10,000 times without replacement from the original data and used  
131 those to generate the endogenous variables for training and internal validation sets, using the  
132 linear equations from the SEM. We then generated three external validation sets implemented  
133 by interventions on the exogenous variables to reflect three different populations with 1) a

134 younger mean age, compared to the original data (73 years  $\Rightarrow$  35 years) 2) lower prevalence  
135 of the APOE  $\epsilon$ 4 gene compared to the original data (46.9%  $\Rightarrow$  10.0%), and 3) increased  
136 percentage of females compared to the original data (52.6%  $\Rightarrow$  90.0%). For the external age-  
137 intervention data, we sampled the age variable from a normal distribution with a mean age of  
138 35 and standard deviation of 10 and bootstrapped together APOE  $\epsilon$ 4 and sex. For the APOE  
139  $\epsilon$ 4 intervention, we sampled from a Bernoulli distribution with 10% probability. For the sex  
140 intervention, we sampled from a Bernoulli distribution with 90% probability.  
141 The generated exogenous variables age, APOE  $\epsilon$ 4 and sex were then used as input to  
142 generate endogenous variables, using the SEM estimates.

### 143 Prediction algorithms

144 We applied logistic regression, lasso regression, random forest and generalized boosted  
145 regression (GBM) to predict the cognitive state of an individual as either cognitive normal or  
146 cognitive impairment. Logistic regression was performed using the glm function in the 'stats'  
147 R package. Lasso regression was implemented using the 'glmnet' R package [36]. The lasso  
148 model was initialized with an optimized penalization hyperparameter obtained from a grid-  
149 search with 10-fold cross validation that selected the minimum value of lambda for minimum  
150 deviance. The random forest is an ensemble of regression trees which aims at improving the  
151 generalizability compared to a single regression tree [37]. Previous works demonstrated the  
152 strengths of random forests for diagnostic prediction modelling of AD [3–5]. The random forest  
153 algorithm was applied from the 'randomForest' R package, using 500 trees (as per default).  
154 GBM implements boosting by adding regression trees sequentially with respect to the error of  
155 the current tree ensemble. This boosting approach increases robustness and generalizability  
156 compared to a single regression tree [38–40]. The GBM algorithm was applied using the 'gbm'  
157 R package with 100 trees (as per default).

158

159 Based on the causal assumptions in our DAG, we defined three predictor sets that included  
160 either all variables or only those which are direct causes of the outcome (parent nodes), or

161 only direct consequences of the outcome (children nodes) (Table 1). Each ML model was  
162 trained and validated with each predictor set. We performed 30,000 repetitions, in which the  
163 five datasets (one for training, one for internal validation and three for external validation) were  
164 generated and used for training and validating all prediction models.

### 165 Calibration metric

166 We assessed the transportability of all prediction models using calibration metrics. We  
167 measured the calibration of all trained prediction models in the internal validation setting and  
168 in each external validation setting. Calibration was measured using the Integrated Calibration  
169 Index (ICI) [41] and the calibration component of a three-way decomposed Brier score. Low  
170 ICI and Brier scores indicate better calibration. The Brier calibration component was obtained  
171 from the bias-corrected 'BrierDecomp' function of the 'SpecsVerification' R package using  
172 quantile bins of predicted probabilities in 10% steps. ICI and Brier scores are given with 95%  
173 confidence intervals (95%CI).

174 We calculated the calibration difference (ICI or Brier score) between the internal setting and  
175 each external validation setting to assess transportability. Differences of zero indicate equal  
176 calibration in both internal validation and external settings and therefore good transportability.  
177 Negative values indicate decreased calibration from internal validation to the intervention  
178 setting and therefore decreased transportability. We calculated the median and 95%CI for  
179 calibration metrics across all 30,000 repetitions.

## 180 **Results**

### 181 Description of the participants' characteristics

182 The ADNI study, represented in TADPOLE, recorded a total of 1737 participants at baseline  
183 together with their diagnosis, demographic information (age, sex, and education), behavioural  
184 information (smoking and alcohol abuse history), clinical measurements (BMI, FDG-PET,  
185 brain volumetric measurements with MR imaging, A $\beta$  and tau concentrations in cerebrospinal

186 fluid (CSF), Minimental State Cognitive Exam (MMSE) and medical history (history of  
187 hypertension and cardiovascular events) (Table 2). Among all participants, 1214 (69.9%) had  
188 cognitive impairment.

### 189 Semi-synthetic data generation

190 The SEM was able to estimate all parameters quantifying the causal relationships in our DAG.  
191 We reviewed the estimated parameters and found that many were in agreement with existing  
192 neurology domain knowledge. For example, age had a positive coefficient and therefore  
193 increased CSF-tau (0.37), the likelihood of hypertension (0.11) and the likelihood of  
194 cardiovascular events history (0.13) (Supplementary Table S1). Some estimated relationships  
195 however, were controversial to domain knowledge. For example, increasing age decreased  
196 CSF-A $\beta$  (-0.14) and the likelihood of cognitive impairment (-0.13). The SEM additionally  
197 indicated a small correlation between sex and age (Pearson correlation = 0.06) and between  
198 age and APOE  $\epsilon$ 4 (Pearson correlation = -0.05).

199  
200 We compared endogenous variable distributions between the original ADNI data and  
201 generated validation datasets and found that the percentage of cognitive impairment was  
202 underestimated in the internal validation set (40.7%, 95%CI [39.8, 41.7]) in comparison to the  
203 original ADNI data (69.9%) (Supplementary Table S3). We further compared endogenous  
204 variable distributions between internal and external datasets. Lowering the mean age from the  
205 internal validation setting to the external setting under age intervention, decreased the  
206 prevalence of cognitive impairment from 40.7% to 26.0%, increased the smoking prevalence  
207 from 23.8% to 34.7% and alcohol abuse history from 0.6% to 35.0%, decreased the  
208 prevalence of hypertension from 23.0% to 7.3% and previous cardiovascular events from  
209 60.5% to 37.3%. Intervening on age increased the mean of A $\beta$  from 1658.1 to 2092.9 pg/ml,  
210 shrank the mean of tau from 265.4 to 20.1 pg/ml and increased the MMSE from 28.0 to 30.0,  
211 in comparison to the internal validation data.



212 In the APOE  $\epsilon$ 4 intervention, lowering the prevalence of the APOE  $\epsilon$ 4 gene from the internal  
213 setting to the external setting decreased the prevalence of cognitive impairment from 40.7%  
214 to 33.8%, increased the mean of CSF-A $\beta$  from 1658.1 to 1843.1 pg/ml and decreased the  
215 mean CSF-tau from 265.4 to 237.1 pg/ml.

216 In the sex intervention, increasing the percentage of females from the internal setting to the  
217 external setting decreased the frequency of cognitive impairment from 40.7% to 32.4%, while  
218 other variable distributions were similar to the internal validation setting.

### 219 Transportability

220 Transportability of logistic regression, lasso regression, random forest and gradient boosting  
221 was measured by ICI and Brier calibration differences (Supplementary Table S4) between  
222 internal validation and intervention settings.

223

224 First, we compared the transportability of models based on parent variables with the  
225 transportability of models based on children variables. In all intervention settings, we found  
226 that models predicting with parent nodes were more transportable than those predicting with  
227 children nodes (ICI: Figure 3, Brier: Figure 4). Models predicting with parents had good  
228 transportability in intervention settings, indicated by a similar calibration between the internal  
229 validation and intervention setting. For example, the difference in ICI between the internal  
230 validation and age intervention for logistic regression was very small (median ICI -0.007,  
231 95%CI [-0.038, 0.007]). Models predicting with children had low transportability in intervention  
232 settings, as indicated by negative calibration differences. For example, logistic regression  
233 predicting with children had a median ICI difference between the internal and age intervention  
234 setting of -0.094, 95%CI [-0.108, -0.078], which was 12.8-fold lower compared to predicting  
235 with parents. Only the GBM model showed better transportability in the age intervention setting  
236 when predicting with children (median ICI -0.004, 95%CI [-0.020, -0.010]) than with parents  
237 (median ICI -0.028, 95%CI [-0.050, -0.009]). We compared the transportability difference  
238 between logistic and lasso models predicting with parents and children across intervention

239 settings. While logistic and lasso models had very similar calibrations, we found that the  
240 median ICI difference between parents and children was largest in the age intervention (0.087)  
241 and sex intervention (0.052) and more subtle in the APOE  $\epsilon$ 4 setting (0.013).

242

243 Second, we compared the transportability between all predictors and parent predictors.  
244 Logistic regression and lasso regression models predicting with all and parent variables were  
245 similarly transportable in all intervention settings. For example, the logistic model had close to  
246 zero median ICI differences between internal and intervention settings (age intervention: all  
247 predictors -0.009, 95%CI [-0.045, 0.006], parent predictors: -0.007, 95%CI [-0.038, 0.007];  
248 APOE  $\epsilon$ 4 intervention: all predictors 0.000, 95%CI [-0.008, 0.008], parent predictors 0.000,  
249 95%CI [-0.009, 0.009]; sex intervention: all predictors 0.000, 95%CI [-0.009, 0.009], parent  
250 predictors 0.000, 95%CI [-0.010, 0.009]). The random forest model had similar transportability  
251 (ICI difference) in APOE  $\epsilon$ 4 intervention and sex intervention settings when predicting with all  
252 and with parent predictors (APOE  $\epsilon$ 4 intervention: all variables 0.001, 95%CI [-0.009, 0.011];  
253 parent variables: -0.001 [-0.014, 0.011]). In the age intervention setting, the random forest  
254 model predicting with parents (median ICI difference: 0.009, 95%CI [-0.033, 0.031]) was  
255 similarly transportable than predicting with all variables (-0.029, 95%CI [-0.058, -0.008]), with  
256 different medians but overlapping confidence intervals. GBM models predicting with all and  
257 parent variables had similarly small median ICI differences in APOE  $\epsilon$ 4 (all: 0.001, 95%CI [-  
258 0.009, 0.011], parents: 0.001, 95%CI [-0.011, 0.012]) and sex intervention settings (all: -0.001,  
259 95%CI [-0.012, 0.010], parents: -0.001, 95%CI; [-0.014, 0.011]). In the age-intervention  
260 setting, however, GBM models was similarly transportable (larger negative median ICI  
261 differences) when predicting with parents (-0.028, 95%CI [-0.050, -0.009]) compared to all (-  
262 0.019, 95%CI [-0.037, -0.002]) and children predictors (-0.004, 95%CI [-0.020, 0.010]). One  
263 explanation for these inconsistencies could be that in the internal validation setting, random  
264 forest and GBM models with parent predictors had three to four times poorer median ICI  
265 calibration than lasso and logistic regression with parents (logistic and lasso: 0.009, 95%CI

266 [0.004, 0.017]; random forest: 0.037, 95%CI [0.026, 0.048]; GBM: 0.028, 95%CI [0.018,  
267 0.039], Supplementary Table S5).

268

269 We observed that transportability measured by Brier score differences (Figure 4, Table S4)  
270 between internal validation and external settings supported the same trends as the ICI  
271 differences. The scale of the Brier scores were exactly zero or closer to zero in the internal  
272 validation setting, compared to the ICI scores (Supplementary Table S5).

## 273 **Discussion**

274 In this study, we have presented a general framework for assessing the transportability of ML  
275 models and applied the framework to evaluate the transportability of prediction models for  
276 cognitive impairment in external settings with different distributions of age, APOE  $\epsilon$ 4 allele  
277 frequency and sex.

278

279 Our application shows that causal thinking is important when selecting predictors for clinical  
280 prediction models. We demonstrated that, under a specific set of interventions, transportability  
281 remained stable when ML models predicted with all variables or only causes (parent nodes),  
282 but was reduced when predicting with consequences (children nodes) of the diagnostic  
283 outcome 'cognitive impairment'. We demonstrated this in all prediction models (logistic  
284 regression, lasso regression, random forest, and GBM) with one exception, when validating  
285 GBM models in the age intervention setting. A closer investigation of the models showed  
286 miscalibration of random forest and GBM models in the internal validation setting. Calibration  
287 of GBM models predicting with children nodes was low in the internal validation setting and  
288 remained low in all intervention settings, which serves as an explanation of the inconsistent  
289 results of GBM models in the age intervention setting. This miscalibration might have  
290 happened because we generated data assuming linear relationships in the SEM, whereas  
291 random forest and GBM are designed to capture non-linear relationships [42].

292

293 Our findings can guide the process of selecting predictor variables. Predictors are often  
294 selected based on how much they increase model performance in the development setting.  
295 Previously developed prediction models for dementia and AD have used brain volumetric  
296 measures or cognitive assessment scores as predictors because they reduced prediction  
297 errors [5,43,44]. We assumed that cognitive status increases the likelihood of seeing MR  
298 images with volumetric changes in brain morphology and we mapped brain volumetric  
299 measurements and cognitive assessment scores as consequences. Another work similarly  
300 assumed that the brain morphological state (measured by regional brain volumes) influences  
301 the performance in cognitive tests [45]. We showed, in agreement with theoretical work  
302 [20,25], that the transportability of models predicting with information on the consequences of  
303 the outcome of interest (i.e., the anti-causal direction) is more likely to be reduced in settings  
304 with different underlying demographic or genetic distributions. Another work suggested that  
305 predictors derived from medical images may often predict in the anti-causal direction as they  
306 depict the consequences of a disease, which may raise a caveat towards transportability [15].

307

### 308 Limitations

309 Our framework and its application has limitations in each step. First, our application focused  
310 on the prediction of cognitive impairment within the AD continuum, while there are also other  
311 types of impairments, e.g. from brain injury, which were not considered. It cannot be  
312 empirically verified if DAGs map causal relationships correctly and if all relevant factors were  
313 included. We only included observed variables (other than latent variables for factors) and it  
314 is likely that there are unobserved variables within the causal processes of cognitive  
315 impairment. Strong domain expertise is crucial to increase the correctness of DAGs [32]. We  
316 included neurological and epidemiological domain expertise for creating our DAG, but our  
317 knowledge may not be complete from other perspectives. Conditional independence tests can  
318 test if there is evidence against a given DAG in a dataset [12]. We applied conditional  
319 independence tests to add directed connections between variables, but unexplainable  
320 violations were present. One study suggested that causal relationships should generally be

321 assumed to exist between any two variables and they should only be omitted when evidence  
322 is available [22]. We ensured that our assumptions in the DAG correctly represent the data by  
323 using semi-synthetic data so that any possible misspecification of the DAG did not affect the  
324 evaluation of the model transportability.

325

326 Second, we applied a SEM to the ADNI data to quantify the causal relationships in our DAG.  
327 While SEMs are widely applied for this purpose [16], their methodology comes with limitations,  
328 for example, when using categorical variables [46–48]. In our application, we had seven  
329 categorical variables and found a small correlation between sex and age and between age  
330 and APOE  $\epsilon$ 4. We assume their correlation might stem from biased selection in the ADNI study  
331 or an unknown common cause, which we did not consider in our DAG. Additionally, we found  
332 that some parameter estimates in the SEM were controversial to domain knowledge. For  
333 example, the relationship between age and cognitive impairment was estimated to be -0.13,  
334 whereas the prevalence of cognitive impairment increases with age. We hypothesize that  
335 these incorrect estimates explain why the SEM underestimated the percentage of cognitive  
336 impairment, and suggest that the model misspecified some relationships in the underlying  
337 ADNI data generation process.

338

339 Third, we simulated external validation data by intervening on one exogenous variable (age,  
340 sex, and APOE  $\epsilon$ 4) at a time. These interventions may simplify differences between  
341 populations in real-world applications. For example, it is possible that multiple variables  
342 including endogenous variables such as BMI vary jointly from one validation setting to another.  
343 Moreover, it is also possible that causal relationships themselves change from one setting to  
344 the other.

345

346 Lastly, we applied our framework to assess transportability using structured data. Applications  
347 using high-dimensional unstructured data (such as images) require novel methods due to the  
348 difficulty of mapping causal relationships for unstructured data.

349

## 350 Outlook

351 Our framework to assess the transportability of models predicting cognitive impairment can be  
352 extended to overcome the described limitations. Future work could adapt the framework to the  
353 work of Pölsterl et al. and include unobserved variables in the DAG [45]. To ensure that the  
354 estimated parameters of causal relationships follow biological laws, future refinements could  
355 include the SEM with prior distributions as implemented in the *blavaan* R package [49]. Future  
356 research could adapt our framework to assess the transportability of prediction models when  
357 intervening on endogenous variables and causal relationships, because real-world  
358 populations likely do not only differ by exogenous variables. Recent ML models predicted AD  
359 from medical images [7,50], which requires new approaches to identify the causal structure in  
360 complex data [51].

361

## 362 **Ethics**

363 The ADNI study was approved by the Institutional Review Boards of all of the participating  
364 institutions. Informed written consent was obtained from all participants at each site as  
365 described in [30,31].

366 **Contributions**

367 MP and SK conceptualized the study. JF implemented the methods in R, ran the analyses,  
368 and drafted a first version of the manuscript. JF, MP, SK analysed the results. SK supervised  
369 the study. TK consulted the creation of the DAG. All authors provided critical input to the  
370 manuscript and approved the final version.

371 **Conflict of interest**

372 TK reports outside the submitted work to have received research grants from the German  
373 Joint Committee and the German Ministry of Health. He further reports personal  
374 compensation from Eli Lilly and Company, Teva, TotalEnergies S.E. and the BMJ. MP  
375 reports having received partial funding for a self-initiated research project from Novartis  
376 Pharma. MP further reports being awarded a research grant from the Center for Stroke  
377 Research Berlin (private donations) for a self-initiated project. All other authors declare no  
378 conflicts of interest.

379 **Acknowledgements**

380 We thank Prof. Dr. Terrence Jorgensen (Assistant Professor, Methods and Statistics  
381 Research Institute for Child Development and Education, the University of Amsterdam) for  
382 providing support for the R lavaan package.

383 Data collection and sharing for this project was funded by the Alzheimer's Disease  
384 Neuroimaging Initiative (ADNI) (National Institutes of Health Grant U01 AG024904) and DOD  
385 ADNI (Department of Defense award number W81XWH-12-2-0012). ADNI is funded by the  
386 National Institute on Aging, the National Institute of Biomedical Imaging and Bioengineering,  
387 and through generous contributions from the following: AbbVie, Alzheimer's Association;  
388 Alzheimer's Drug Discovery Foundation; Araclon Biotech; BioClinica, Inc.; Biogen; Bristol-  
389 Myers Squibb Company; CereSpir, Inc.; Cogstate; Eisai Inc.; Elan Pharmaceuticals, Inc.; Eli  
390 Lilly and Company; EuroImmun; F. Hoffmann-La Roche Ltd and its affiliated company



391 Genentech, Inc.; Fujirebio; GE Healthcare; IXICO Ltd.; Janssen Alzheimer Immunotherapy  
392 Research & Development, LLC.; Johnson & Johnson Pharmaceutical Research &  
393 Development LLC.; Lumosity; Lundbeck; Merck & Co., Inc.; Meso Scale Diagnostics, LLC.;  
394 NeuroRx Research; Neurotrack Technologies; Novartis Pharmaceuticals Corporation; Pfizer  
395 Inc.; Piramal Imaging; Servier; Takeda Pharmaceutical Company; and Transition  
396 Therapeutics. The Canadian Institutes of Health Research is providing funds to support ADNI  
397 clinical sites in Canada. Private sector contributions are facilitated by the Foundation for the  
398 National Institutes of Health ([www.fnih.org](http://www.fnih.org)). The grantee organization is the Northern  
399 California Institute for Research and Education, and the study is coordinated by the  
400 Alzheimer's Therapeutic Research Institute at the University of Southern California. ADNI data  
401 are disseminated by the Laboratory for Neuro Imaging at the University of Southern California.  
402

## 403 References

- 404 [1] GBD 2016 Neurology Collaborators VL, Nichols E, Alam T, Bannick MS, Beghi E,  
405 Blake N, et al. Global, regional, and national burden of neurological disorders, 1990-  
406 2016: a systematic analysis for the Global Burden of Disease Study 2016. *Lancet*  
407 *Neurol.* 2019;18(5):459-480. doi:10.1016/S1474-4422(18)30499-X  
408 [2] Sabbagh MN, Boada M, Borson S, Doraiswamy PM, Dubois B, Ingram J, et al. Early  
409 Detection of Mild Cognitive Impairment (MCI) in an At-Home Setting. *J Prev*  
410 *Alzheimer's Dis.* 2020;7(3):171-178. doi:10.14283/jpad.2020.22  
411 [3] Weiner MW, Veitch DP, Aisen PS, Beckett LA, Nigel J, Green RC, et al. Recent  
412 publications from the Alzheimer's Disease Neuroimaging Initiative: Reviewing  
413 progress toward improved AD clinical trials. *Alzheimers Dement.* 2017;13(4):1-85.  
414 doi:10.1016/j.jalz.2016.11.007  
415 [4] Sarica A, Cerasa A, Quattrone A. Random forest algorithm for the classification of  
416 neuroimaging data in Alzheimer's disease: A systematic review. *Front Aging Neurosci.*  
417 2017;9(OCT):1-12. doi:10.3389/fnagi.2017.00329  
418 [5] Moore PJ, Lyons TJ, Gallacher J. Random forest prediction of Alzheimer's disease  
419 using pairwise selection from time series data. *PLoS One.* 2019;14(2):1-14.  
420 doi:10.1371/journal.pone.0211558  
421 [6] Al-Amyr Valliani A, Ranti D, Oermann KE. Deep Learning and Neurology: A  
422 Systematic Review. *Neurol Ther.* 2019;8:351-365. doi:10.6084/m9.figshare.9272951  
423 [7] Kang MJ, Kim SY, Na DL, Kim BC, Yang DW, Kim EJ, et al. Prediction of cognitive  
424 impairment via deep learning trained with multi-center neuropsychological test data.  
425 *BMC Med Inform Decis Mak.* 2019;19(1):1-9. doi:10.1186/s12911-019-0974-x  
426 [8] Grueso S, Viejo-Sobera R. Machine learning methods for predicting progression from  
427 mild cognitive impairment to Alzheimer's disease dementia: a systematic review.  
428 *Alzheimers Res Ther.* 2021;13(1):1-29. doi:10.1186/s13195-021-00900-w  
429 [9] Siontis GCM, Tzoulaki I, Castaldi PJ, Ioannidis JPA. External validation of new risk  
430 prediction models is infrequent and reveals worse prognostic discrimination. *J Clin*



- 431 *Epidemiol.* 2015;68(1):25-34. doi:10.1016/j.jclinepi.2014.09.007
- 432 [10] Steyerberg EW. *Clinical Prediction Models: A Practical Approach to Development,*
- 433 *Validation and Updating. Second Edition.* Second Edi. Springer Nature; 2019.
- 434 [11] Schölkopf B, Janzing D, Peters J, Sgouritsa E, Zhang K, Mooij JMOOIJ J. *On Causal*
- 435 *and Anticausal Learning.*
- 436 [12] Peters J, Janzing D, Schölkopf B. *Elements of Causal Inference: Foundations and*
- 437 *Learning Algorithms.* Vol 88.; 2018. doi:10.1080/00949655.2018.1505197
- 438 [13] Prospero M, Guo Y, Sperrin M, Koopman JS, Min JS, He X, et al. Causal inference
- 439 and counterfactual prediction in machine learning for actionable healthcare. *Nat Mach*
- 440 *Intell.* 2020;2:369–375. doi:10.1038/s42256-020-0197-y
- 441 [14] Kilbertus N, Parascandolo G, Schölkopf B, De BM. Generalization in anti-causal
- 442 learning. *arXiv.* Published online December 3, 2018. Accessed January 26, 2022.
- 443 <https://arxiv.org/abs/1812.00524v1>
- 444 [15] Castro DC, Walker I, Glocker B. Causality matters in medical imaging. *Nat Commun.*
- 445 2020;11(1):1-10. doi:10.1038/s41467-020-17478-w
- 446 [16] Richens JG, Lee CM, Johri S. Improving the accuracy of medical diagnosis with
- 447 causal machine learning. *Nat Commun.* 2020;11(1):3923. doi:10.1038/s41467-020-
- 448 17419-7
- 449 [17] Schölkopf B, Locatello F, Bauer S, Ke NR, Kalchbrenner N, Goyal A, et al. Toward
- 450 Causal Representation Learning. *Proc IEEE.* Published online 2021:1-24.
- 451 doi:10.1109/JPROC.2021.3058954
- 452 [18] Pearl J. Causal diagrams for empirical research. *Biometrika.* 1995;82(4):669-688.
- 453 [19] Pearl J, Bareinboim E. Transportability of causal and statistical relations: A formal
- 454 approach. In: *Proceedings of the Twenty-Fifth National Conference on Artificial*
- 455 *Intelligence (AAAI 2011).* AAAI Press; 2011:247–54. doi:10.1109/ICDMW.2011.169
- 456 [20] Schölkopf B, Janzing D, Peters J, Sgouritsa E, Zhang K, Mooij J. On causal and
- 457 anticausal learning. *Proc 29th Int Conf Mach Learn ICML 2012.* 2012;2:1255-1262.
- 458 [21] Pearl J, Bareinboim E. External validity: From do-calculus to transportability across
- 459 populations. *Stat Sci.* 2014;29(4):579-595. doi:10.1214/14-STS486
- 460 [22] Tennant PW, Murray EJ, Arnold KF, Berrie L, Fox MP, Gadd SC, et al. Use of directed
- 461 acyclic graphs (DAGs) to identify confounders in applied health research: review and
- 462 recommendations. *Int J Epidemiol.* 2021;50(2):620-631. doi:10.1093/ije/dyaa213
- 463 [23] Moons KGM, Kengne AP, Woodward M, Royston P, Vergouwe Y, Altman DG, et al.
- 464 Risk prediction models: I. Development, internal validation, and assessing the
- 465 incremental value of a new (bio)marker. *Heart.* 2012;98(9):683-690.
- 466 doi:10.1136/HEARTJNL-2011-301246
- 467 [24] Moons KGM, Kengne AP, Grobbee DE, Royston P, Vergouwe Y, Altman DG, et al.
- 468 Risk prediction models: II. External validation, model updating, and impact
- 469 assessment. *Heart.* 2012;98(9):691-698. doi:10.1136/HEARTJNL-2011-301247
- 470 [25] Piccininni M, Konigorski S, Rohmann JL, Kurth T. Directed acyclic graphs and causal
- 471 thinking in clinical risk prediction modeling. *BMC Med Res Methodol.* 2020;20(1):179.
- 472 doi:10.1186/s12874-020-01058-z
- 473 [26] Ganopoulou M, Kangelidis I, Sianos G, Angelis L. Prediction Model for the Result of
- 474 Percutaneous Coronary Intervention in Coronary Chronic Total Occlusions. *Proc 3rd*
- 475 *Int Conf Stat Theory Appl.* 2021;2018. doi:10.11159/icsta21.129
- 476 [27] Gebremedhin AT, Hogan AB, Blyth CC, Glass K, Moore HC. Developing a prediction
- 477 model to estimate the true burden of respiratory syncytial virus (RSV) in hospitalised
- 478 children in Western Australia. *Sci Rep.* 2022;12(332):1-12. doi:10.1038/s41598-021-
- 479 04080-3
- 480 [28] Sperrin M, Martin GP, Pate A, Van Staa T, Peek N, Buchan I. Using marginal
- 481 structural models to adjust for treatment drop-in when developing clinical prediction
- 482 models. Published online 2018. doi:10.1002/sim.7913
- 483 [29] Dickerman BA, Dahabreh IJ, Cantos K V, Roger ·, Logan W, Lodi S, et al. Predicting
- 484 counterfactual risks under hypothetical treatment strategies: an application to HIV. *Eur*
- 485 *J Epidemiol.* 123AD;1:3. doi:10.1007/s10654-022-00855-8

- 486 [30] Mueller SG, Weiner MW, Thal LJ, Petersen RC, Jack C, Jagust W, et al. The  
487 Alzheimer's disease neuroimaging initiative. *Neuroimaging Clin N Am*.  
488 2005;15(4):869-877. doi:doi: 10.1016/j.nic.2005.09.008.
- 489 [31] Petersen RC, Aisen PS, Beckett LA, Donohue MC, Gamst AC, Harvey DJ, et al.  
490 *Alzheimer's Disease Neuroimaging Initiative (ADNI) Clinical Characterization.*; 2010.  
491 [www.neurology.org](http://www.neurology.org)
- 492 [32] Pearl J. *Causality: Models, Reasoning and Inference*. Cambridge University Press;  
493 2000.
- 494 [33] Hernán MA, Robins JM. Causal Inference. *Causal Inference What If*. Published online  
495 2019;235-281. doi:10.1017/9781316831762.008
- 496 [34] Ankan A, Wortel IMN, Textor J. Testing Graphical Causal Models Using the R  
497 Package "dagitty." *Curr Protoc*. 2021;1(2):1-22. doi:10.1002/cpz1.45
- 498 [35] Rosseel Y. Lavaan: An R package for structural equation modeling. *J Stat Softw*.  
499 2012;48(2). doi:10.18637/jss.v048.i02
- 500 [36] Friedman J, Hastie T, Tibshirani R. Regularization Paths for Generalized Linear  
501 Models via Coordinate Descent. *J Stat Softw*. 2010;33(1):1-22.
- 502 [37] Breiman L. Random forests. *Mach Learn*. 2001;45(1):5-32.  
503 doi:10.1023/A:1010933404324
- 504 [38] Friedman JH. Greedy function approximation: A gradient boosting machine. *Ann Stat*.  
505 2001;29(5):1189-1232. doi:10.1214/aos/1013203451
- 506 [39] Friedman JH. Stochastic gradient boosting. *Comput Stat Data Anal*. 2002;38(4):367-  
507 378. doi:10.1016/S0167-9473(01)00065-2
- 508 [40] Hastie T, Tibshirani R, Friedman JH. 10. Boosting and Additive Trees. In: *The*  
509 *Elements of Statistical Learning*. 2nd ed. Springer; 2009:337-384.
- 510 [41] Austin PC, Steyerberg EW. The Integrated Calibration Index (ICI) and related metrics  
511 for quantifying the calibration of logistic regression models. *Stat Med*.  
512 2019;38(21):4051-4065. doi:10.1002/sim.8281
- 513 [42] Hastie T, Tibshirani R, Friedman J. *The Elements of Statistical Learning. Data Mining,*  
514 *Inference, and Prediction*. Vol 27. Second Edi. Springer Science + Business Media;  
515 2009. doi:10.1007/b94608
- 516 [43] Lebedev A V., Westman E, Van Westen GJP, Kramerberger MG, Lundervold A,  
517 Aarsland D, et al. Random Forest ensembles for detection and prediction of  
518 Alzheimer's disease with a good between-cohort robustness. *NeuroImage Clin*.  
519 2014;6:115-125. doi:10.1016/j.nicl.2014.08.023
- 520 [44] Guest F, Kuzma E, Everson R, Llewellyn DJ, David Llewellyn CJ. Identifying key  
521 features for dementia diagnosis using machine learning. *Alzheimer's Dement*.  
522 2020;16:e046092. doi:10.1002/alz.046092
- 523 [45] Pölsterl S, Wachinger C. Estimation of Causal Effects in the Presence of Unobserved  
524 Confounding in the Alzheimer's Continuum. In: *Information Processing in Medical*  
525 *Imaging*. Springer International Publishing; 2021:45-57. doi:10.1007/978-3-030-  
526 78191-0\_4
- 527 [46] Sass DA, Schmitt TA, Marsh HW. Evaluating Model Fit With Ordered Categorical  
528 Data Within a Measurement Invariance Framework: A Comparison of Estimators.  
529 *Struct Equ Model*. 2014;21(2):167-180. doi:10.1080/10705511.2014.882658
- 530 [47] Bandalos DL. Relative Performance of Categorical Diagonally Weighted Least  
531 Squares and Robust Maximum Likelihood Estimation. *Struct Equ Model*.  
532 2014;21(1):102-116. doi:10.1080/10705511.2014.859510
- 533 [48] DiStefano C, Morgan GB. A Comparison of Diagonal Weighted Least Squares Robust  
534 Estimation Techniques for Ordinal Data. *Struct Equ Model*. 2014;21(3):425-438.  
535 doi:10.1080/10705511.2014.915373
- 536 [49] Merkle EC, Rosseel Y. Blavaan: Bayesian Structural Equation Models Via Parameter  
537 Expansion. *J Stat Softw*. 2018;85(4). doi:10.18637/jss.v085.i04
- 538 [50] Nigri E, Ziviani N, Cappabianco F, Antunes A, Veloso A. Explainable Deep CNNs for  
539 MRI-Based Diagnosis of Alzheimer's Disease. *arXiv*. Published online 2020.  
540 <http://arxiv.org/abs/2004.12204>

541 [51] Pawlowski N, Castro DC, Glocker B. Deep structural causal models for tractable  
542 counterfactual inference. In: *34th Conference on Neural Information Processing*  
543 *Systems (NeurIPS 2020)*. ; 2020.  
544

545 **Tables**

546 Table 1: Predictor sets with corresponding lists of variable names.

| Predictor set  | Variable names                                                                                                                                                                                                                                                                                                           |
|----------------|--------------------------------------------------------------------------------------------------------------------------------------------------------------------------------------------------------------------------------------------------------------------------------------------------------------------------|
| All nodes      | age, APOE $\epsilon$ 4, sex, education, BMI*, history of hypertension, history of alcohol abuse, history of smoking behaviour, history of cardiovascular event, CSF <sup>†</sup> -tau, CSF <sup>†</sup> -A $\beta$ <sup>‡</sup> , hippocampus, ventricles, intracranial volume, FDG-PET <sup>§</sup> , MMSE <sup>¶</sup> |
| Parent nodes   | age, APOE $\epsilon$ 4, sex, education, BMI*, history of cardiovascular event, CSF <sup>†</sup> -tau, CSF <sup>†</sup> -A $\beta$ <sup>‡</sup>                                                                                                                                                                           |
| Children nodes | hippocampus, ventricles, intracranial volume, FDG-PET <sup>§</sup> , MMSE <sup>¶</sup>                                                                                                                                                                                                                                   |

547 \*BMI: Body Mass Index; <sup>†</sup>CSF: Cerebrospinal fluid; <sup>‡</sup>A $\beta$ : Amyloid  $\beta$ ; <sup>§</sup>FDG-PET: fluorodeoxy-

548 glucose-positron emission tomography; <sup>¶</sup>MMSE: Mini Mental State Exam score

549

550

551 Table 2: Participant characteristics of ADNI dataset at baseline stratified by cognitive state.

| Variables                                  | Cognitive normal<br>n=523          | Cognitive<br>impairment n=1214      | Total<br>n=1737                     |
|--------------------------------------------|------------------------------------|-------------------------------------|-------------------------------------|
| age <sup>#</sup>                           | 73.7 (70.5, 78.0)                  | 74.0 (68.3, 79.3)                   | 73.9 (69.2, 78.9)                   |
| APOE ε4                                    | 149 (28.6%)<br>Nmiss: 2            | 660 (54.8%)<br>Nmiss: 10            | 809 (46.9%)<br>Nmiss: 12            |
| sex (male)                                 | 253 (48.4%)                        | 704 (58.0%)                         | 957 (55.1%)                         |
| education <sup>#</sup> (years)             | 16 (14, 18)                        | 16 (14, 18)                         | 16 (14, 18)                         |
| CSF <sup>†</sup> -Aβ <sup>‡</sup> (pg/ml)  | 1271 (820.8, 1734.0)<br>Nmiss: 156 | 741.5 (559.1, 1130.3)<br>Nmiss: 366 | 854.2 (596.2, 1395.5)<br>Nmiss: 522 |
| CSF <sup>†</sup> -tau <sup>#</sup> (pg/ml) | 214.3 (175.2, 287.8)<br>Nmiss: 156 | 281.6 (210.4, 379.2)<br>Nmiss: 366  | 257.8 (193.4, 349.7)<br>Nmiss: 522  |
| history of alcohol abuse                   | 16 (3.1%)<br>Nmiss: 6              | 27 (2.3%)<br>Nmiss: 27              | 43 (2.5%)<br>Nmiss: 33              |
| history of smoking                         | 115 (26.8%)<br>Nmiss: 94           | 223 (23.2%)<br>Nmiss: 254           | 338 (24.3%)<br>Nmiss: 348           |
| BMI <sup>**</sup>                          | 28.6 (25.8, 32.5)<br>Nmiss: 4      | 28.17 (25.5, 31.2)<br>Nmiss: 5      | 28.31 (25.5, 31.6)<br>Nmiss: 9      |
| history of hypertension                    | 130 (24.9%)                        | 460 (38.0%)<br>Nmiss: 5             | 590 (34.1%)<br>Nmiss: 5             |
| history of cardiovascular events           | 343 (65.6%)                        | 835 (68.8%)                         | 1178 (67.8%)                        |
| MMSE <sup>††</sup>                         | 29 (29.0, 30.0)                    | 27 (25.0, 29.0)                     | 28 (25.0, 29.0)                     |

552 \*BMI: Body Mass Index; <sup>†</sup>CSF: Cerebrospinal fluid; <sup>‡</sup>Aβ: Amyloid β; <sup>††</sup>MMSE: Mini Mental State

553 Exam score

554 NOTE. Numeric variables are indicated with # and are given with median and 25-75%

555 interquartile range (IQR). All other variables are categorical variables with two categories and

556 the absolute number and the column wise percentage of the reference category is given.

557 Absolute numbers of missing values (Nmiss) are given.

558

559

560 **Figures**

561 Figure 1: Framework to assess the transportability of machine learning models predicting  
562 cognitive impairment.  
563

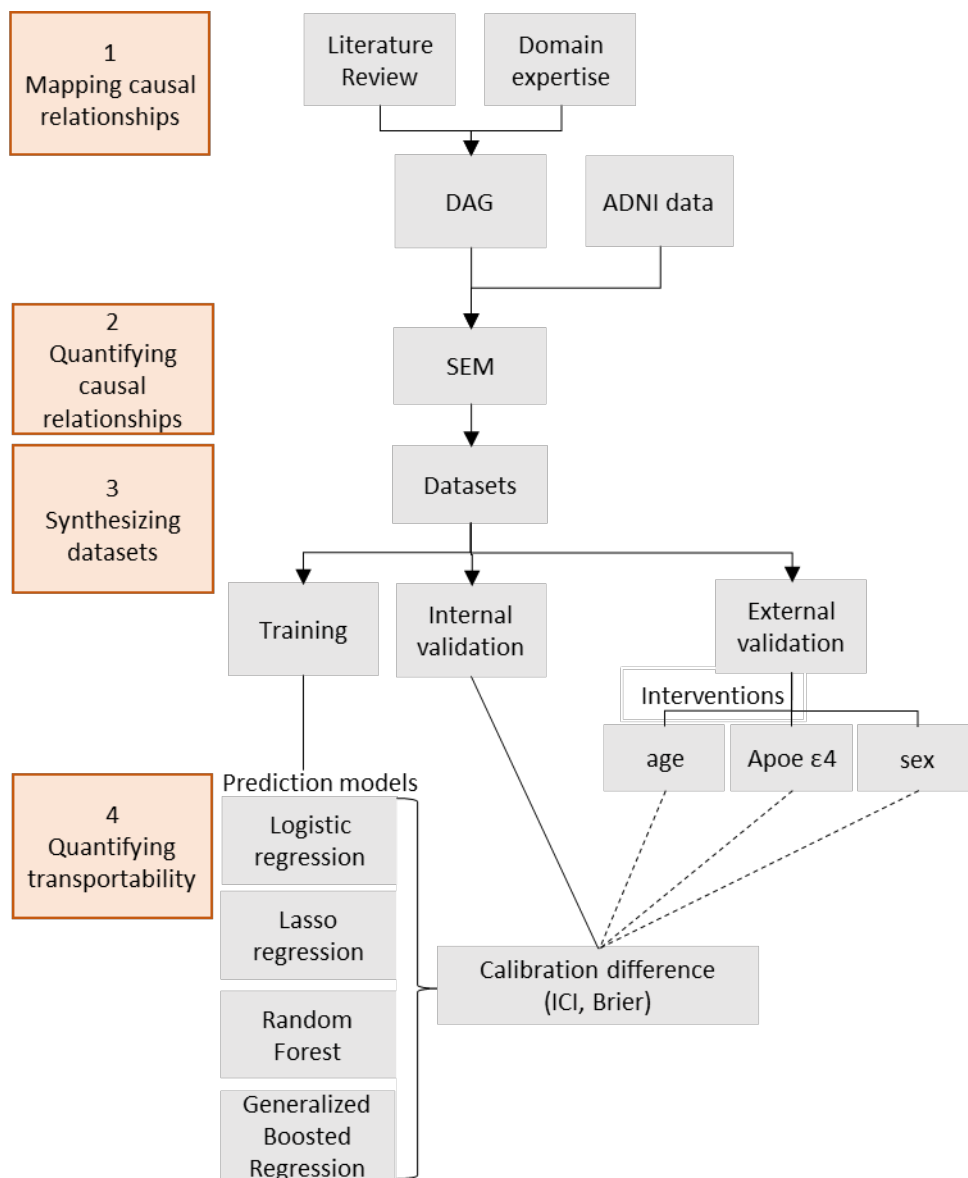

564

565 NOTE. Orange boxes mark the four general steps of this framework. We first mapped  
566 knowledge about cognitive impairment into a Directed Acyclic Graph (DAG) and quantified  
567 those using Structural equation modelling (SEM) and data from the Alzheimer's Disease  
568 Neuroimaging Initiative (ADNI). The estimates were used in linear equations to generate  
569 datasets for training, internal validation and three external validation datasets with  
570 interventions on age, APOE ε4 and sex. We trained four machine learning algorithms (logistic  
571 regression, lasso regression, random forest and generalized boosted regression) to predict

572 cognitive impairment. We measured transportability between internal and external settings  
573 using calibration differences, measured by Integrated Calibration Index (ICI) and Brier score.  
574 Steps 3 and 4 (data synthesis and model training and validation) were repeated 30,000 times.

575

576

577 Figure 2: Directed acyclic graph of variables influencing cognitive status.

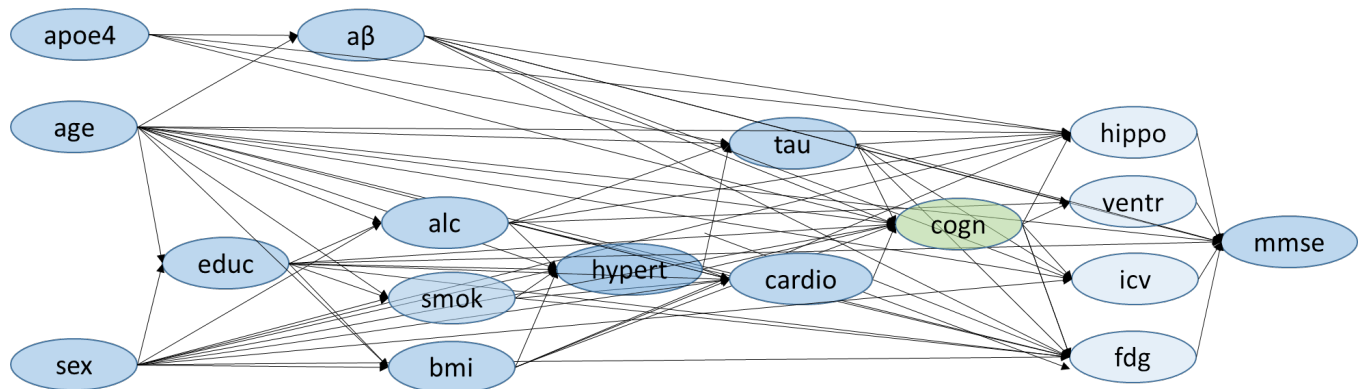

578

579 NOTE. Predictor variables are marked in blue and the outcome variable (cognitive status) in  
580 green. Directed arrows indicate assumed causal relationships between variables. The  
581 included variables are: APOE  $\epsilon$ 4 (apoe4), age, sex, education (educ), CSF-A $\beta$  (a $\beta$ ), history  
582 of alcohol abuse (alc), history of smoking behaviour (smok), Body Mass Index (bmi), history  
583 of hypertension (hypert), CSF-tau (tau), history of cardiovascular events (cardio), cognitive  
584 status (cogn), hippocampus (hippo), ventricles (ventr), intracranial volume (icv), FDG-PET  
585 (fdg), Mini-Mental State Exam score (mmse).



586 Figure 3: Transportability between internal validation and intervention test sets, measured by  
587 the difference of integrated calibration index (ICI).

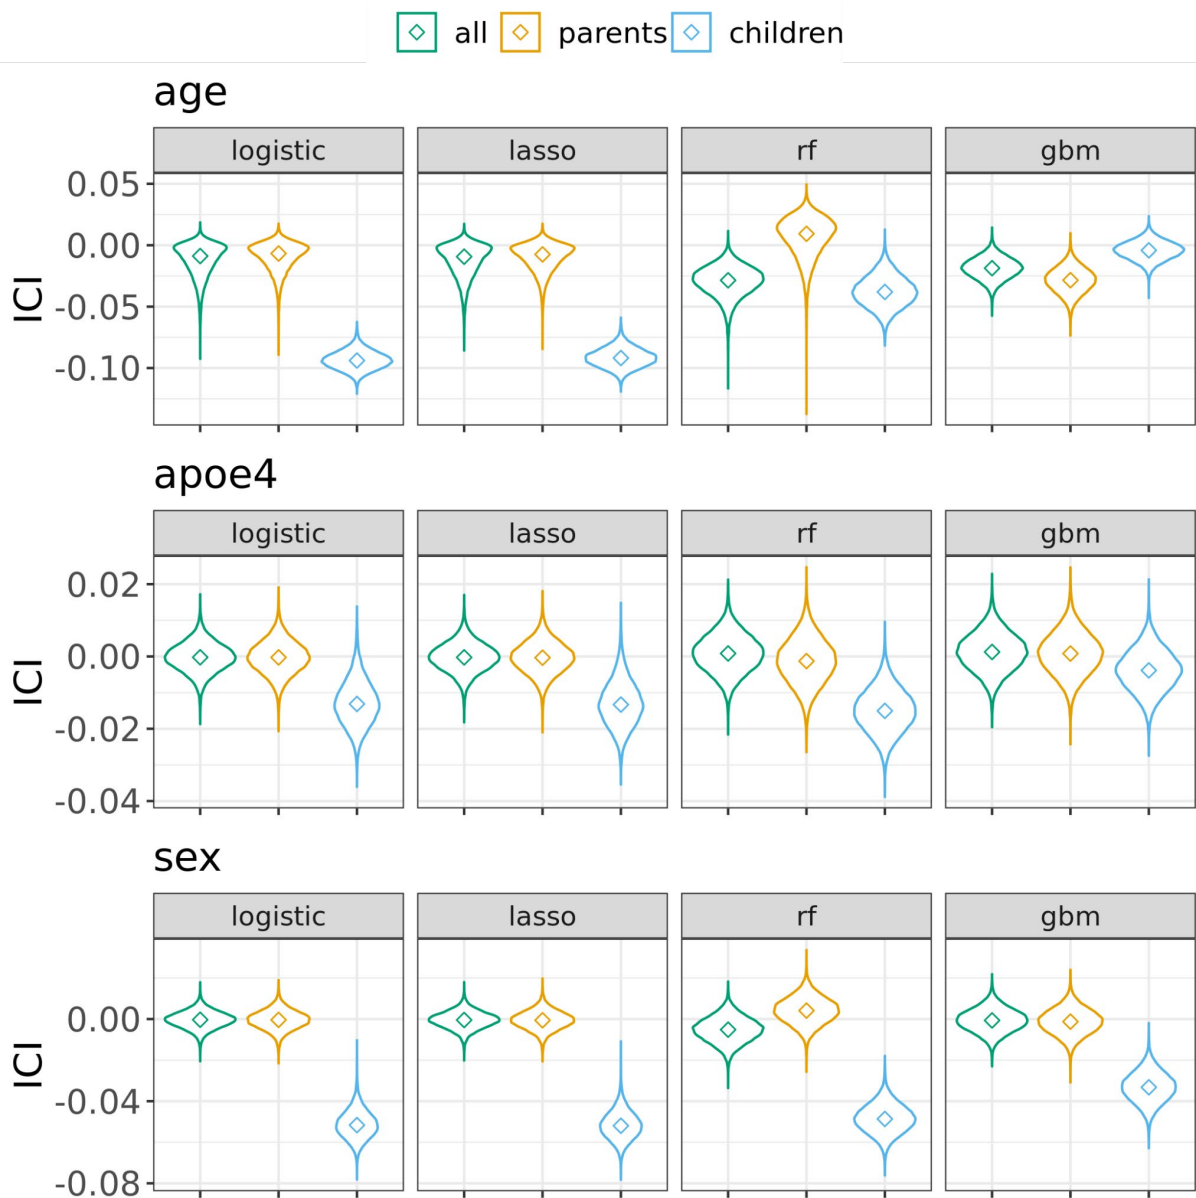

588  
589 NOTE. Three intervention test sets were created with 1) reducing the population mean age  
590 from 73 to 35 years, 2) reducing the APOE ε4 allele frequency from 46.6% to 10.0%, and 3)  
591 increasing the number of female individuals from 45.9% to 90.0%. Cognitive impairment was  
592 predicted using logistic regression, lasso regression random forest (rf) and generalized  
593 boosted regression (gbm) prediction models. Models were trained either with all predictor  
594 variables, only parent nodes (direct causes) of the diagnostic outcome, or only children nodes  
595 (consequences) of the diagnostic outcome.



596 Figure 4: Transportability between training and intervention test sets, measured by the  
597 difference of the Brier calibration component.

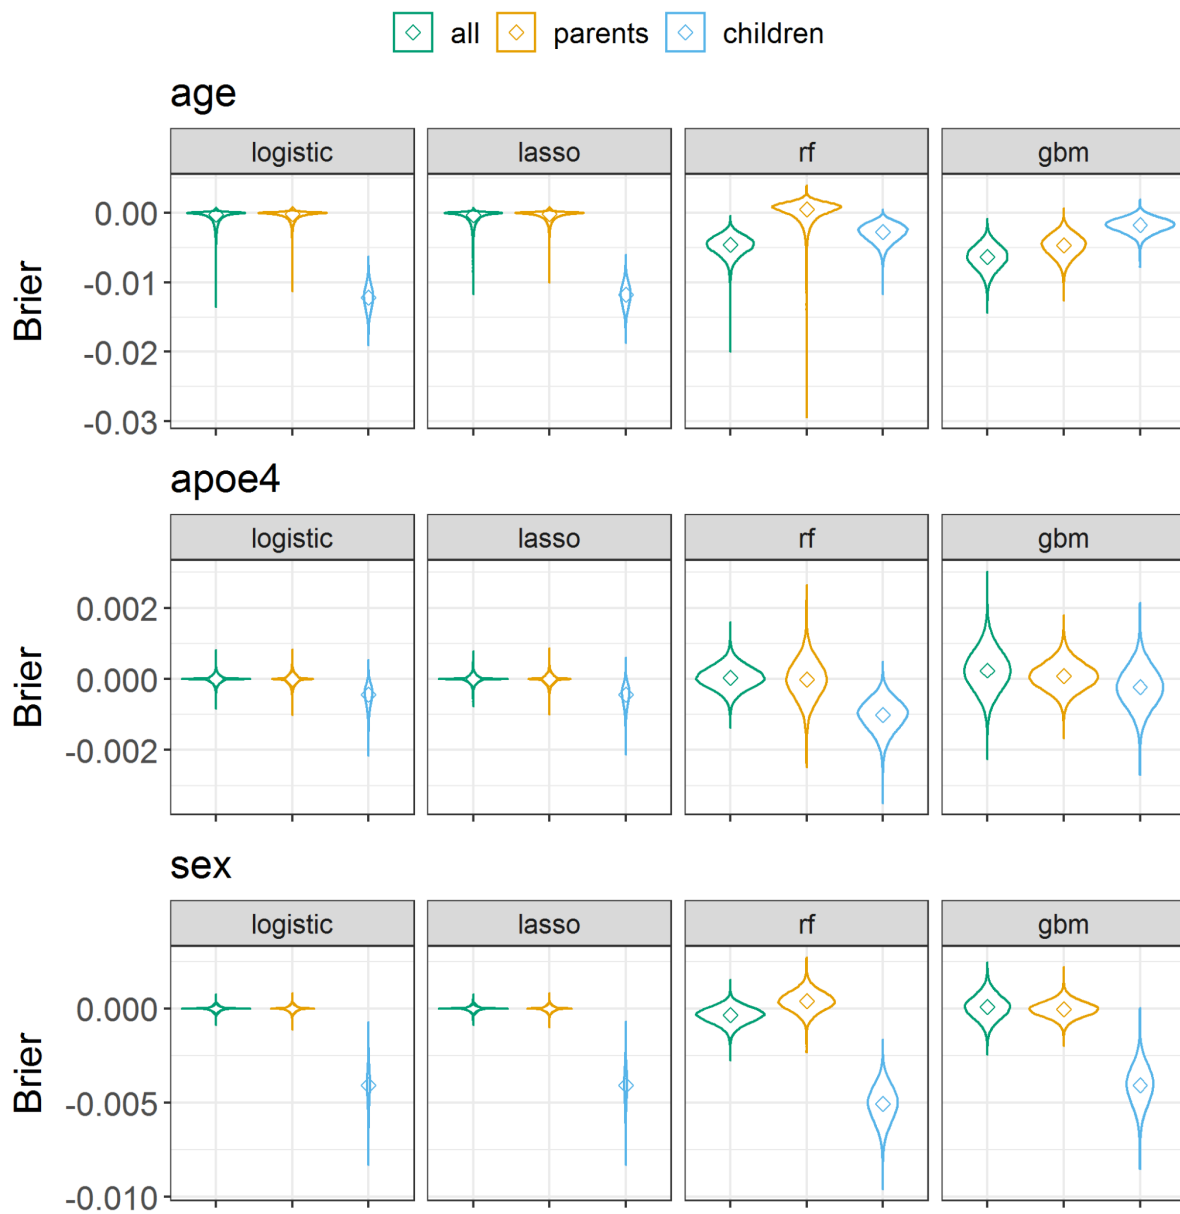

598

599 NOTE. Three intervention test sets were created with 1) reducing the population mean age  
600 from 73 to 35 years, 2) reducing the APOE  $\epsilon 4$  allele frequency from 46.6% to 10.0%, and 3)  
601 increasing the number of female individuals from 45.9% to 90.0%. Cognitive impairment was  
602 predicted using logistic regression, lasso regression random forest (rf) and generalized  
603 boosted regression (gbm) prediction models. Models were trained either with all predictor  
604 variables, only parent nodes (direct causes) of the diagnostic outcome, or only children nodes  
605 (consequences) of the diagnostic outcome.
